## Mechanisms Underlying the Inhibitory Effect of Propofol on the Contraction of Canine Airway Smooth Muscle

Chih-Chung Lin, M.D.,\* Ming-Hwang Shyr, M.D., Ph.D.,† Peter P. C. Tan, M.D.,‡ Chin-Sung Chien, M.S.,§ Shioh-Lin Pan, M.S.,§ Chuan-Chwan Wang, M.S.,§ Chi-Tso Chiu, B.Sc.,§ Chuen-Mao Yang, Ph.D.||

**Background:** Propofol has been shown to produce relaxation of precontracted airway smooth muscle. Although the inhibition of calcium mobilization is supposed to be the major mechanism of action, the whole picture of the mechanisms is not completely clear.

**Methods:** Contractile response was performed using canine tracheal rings. The effects of propofol on carbachol-induced mobilization of intracellular  $\text{Ca}^{2+}$  and phosphoinositide hydrolysis were measured using cultured canine tracheal smooth muscle cells by monitoring fura-2 signal and assessing the accumulation of [ $^3\text{H}$ ]-inositol phosphates. To detect the effect of propofol on muscarinic receptor density and affinity, [ $^3\text{H}$ ]-N-methyl-scopolamine was used as a radioligand for receptor binding assay.

**Results:** Pretreatment with propofol shifts the concentration-response curves of carbachol-induced smooth muscle contraction to the right in a concentration-dependent manner without changing the maximal response. Propofol not only decreased the release of  $\text{Ca}^{2+}$  from internal stores but also inhibited the calcium influx induced by carbachol. In addition, carbachol-induced inositol phosphate accumulation was attenuated by propofol; the inhibitory pattern was similar to the contractile response. Moreover, propofol did not alter the density of muscarinic receptors. The dissociation constant value was not altered by pretreatment with 100  $\mu\text{M}$  propofol but was significantly increased by 300  $\mu\text{M}$  (propofol,  $952 \pm 229$  pM; control,  $588 \pm 98$  pM;  $P < 0.05$ ).

**Conclusions:** Propofol attenuates the muscarinic receptor-mediated airway muscle contraction. The mechanism underlying these effects was attenuation of inositol phosphate generation and inhibition of  $\text{Ca}^{2+}$  mobilization through the inhibition of the receptor-coupled signal-transduction pathway. (Key words: Anesthetics;  $\text{Ca}^{2+}$ ; contraction; fura-2; inositol phosphates; propofol.)

PROPOFOL (2,6-di-isopropylphenol), a widely used intravenous anesthetic with the characteristics of rapid onset, short duration of action, and rapid elimination,<sup>1</sup> is reported to antagonize fentanyl-induced bronchoconstriction during surgery,<sup>2</sup> and to inhibit postoperative bronchospasm in patients with hyperreactive airway disease.<sup>3</sup> In addition, *in vitro*, propofol has been shown to produce relaxation of tracheal smooth muscle (TSM) with spontaneous tone or contraction induced by acetylcholine, carbachol, histamine, prostaglandin  $\text{F}_{2\alpha}$ , and potassium.<sup>4-6</sup> It is well known that  $\text{Ca}^{2+}$  plays an important role in the contraction of smooth muscle. The regulation of intracellular  $\text{Ca}^{2+}$  ( $[\text{Ca}^{2+}]_i$ ) is integrated by several mechanisms located on plasma membrane and intracellular organelles.<sup>7</sup> These include the  $\text{Ca}^{2+}$  release from the internal store and influx of extracellular  $\text{Ca}^{2+}$ . In vascular smooth muscle cells, propofol produced a relaxing effect through the inhibition of  $\text{Ca}^{2+}$  mobilization.<sup>8</sup> Furthermore, propofol has been shown to inhibit voltage-dependent  $\text{Ca}^{2+}$  channels in porcine TSM cells.<sup>9</sup>

In mammalian airway, the parasympathetic nervous system, a predominant neural pathway, plays an important role in the regulation of airway diameter and resistance to airflow.<sup>10</sup> Acetylcholine released from parasympathetic nerve endings stimulates the smooth muscle contraction *via* its binding to muscarinic cholinergic receptors (mAChRs).<sup>11</sup> Following the stimulation of  $\text{M}_3$  receptors on airway smooth muscle,<sup>12-14</sup> phospholipase C is activated *via* a guanosine 5'-triphosphate-binding protein, which hydrolyzes phosphoinositide, leading to the formation of inositol-1,4,5-trisphosphate ( $\text{IP}_3$ ). In rat

\* Research Associate, Department of Anesthesiology.

† Associate Professor, Departments of Anesthesiology and Pharmacology.

‡ Professor, Department of Anesthesiology.

§ Research Technician, Department of Pharmacology.

|| Professor, Department of Pharmacology.

Received from Chang Gung University, Tao-Yuan, Taiwan. Submitted for publication December 7, 1998. Accepted for publication April 14, 1999. Supported by grants CMRP-680 from Chang Gung Medical Research Foundation and NSC88-2314-B182-017-M41 from National Science Council, Kwei-San, Tao-Yuan, Taiwan.

Address reprint requests to Dr. Yang: Department of Pharmacology, College of Medicine, Chang Gung University, 259 Wen-Hua 1 Road, Kwei-San, Tao-Yuan, Taiwan. Address electronic mail to: chuenmao@mail.cgu.edu.tw

aortic smooth muscle, propofol has been shown to inhibit the  $\text{IP}_3$  production induced by endothelin-1 and arginine vasopressin.<sup>8</sup> Thus, propofol might attenuate the  $\text{IP}_3$ -induced  $\text{Ca}^{2+}$  mobilization.

The present study therefore was undertaken to investigate how propofol might modulate the pharmacological properties of mAChRs, inositol phosphate (IP) accumulation,  $\text{Ca}^{2+}$  mobilization, and subsequently the contraction of airway smooth muscle.

## Materials and Methods

### Animals

Mongrel dogs of either sex, 20–30 kg, purchased from a local supplier, were used throughout this study. Dogs were housed indoors in the Laboratory of Animal Resource Center at Chang Gung University under automatically controlled temperature and light cycle and fed with standard laboratory chow and tap water *ad libitum*. The procedures used in this study have been reviewed and approved by the University's animal use committee, indicating that the procedures are in accord with the institutional guidelines for animal use. Dogs were anesthetized with ketamine (6 mg/kg intramuscular), and the lungs were ventilated mechanically *via* an endotracheal tube. The tracheae were surgically removed.

### Contractile Response

The removed trachea, about 20 cm long from larynx to bifurcation, was quickly transferred to oxygenated (95%  $\text{O}_2$  plus 5%  $\text{CO}_2$ ) Krebs-Henseleit solution of the following composition (in mM): NaCl 117, KCl 4.7,  $\text{MgSO}_4$  1.1,  $\text{KH}_2\text{PO}_4$  1.2,  $\text{NaHCO}_3$  20,  $\text{CaCl}_2$  2.4, glucose 1, HEPES 20. The trachea was opened by cutting the cartilage rings opposite to the smooth muscle. The muscle was cleaned in two steps. The initial step in each dissection involved removal of the epithelium and submucosal tissue with forceps. The connective tissue on the serosal surface was carefully cleaned. In order to hook the muscle strips to the transducer, the section of cartilage up to the point of insertion of the muscle was maintained. Then the trachea was cut into separate individual rings. The TSM strips were mounted in an organ bath containing physiologic solution with the composition (in mM): NaCl 125, KCl 5,  $\text{MgCl}_2$  2,  $\text{NaH}_2\text{PO}_4$  0.5,  $\text{NaHCO}_3$  5,  $\text{CaCl}_2$  1.8, glucose 10, HEPES 10, and gases with 95%  $\text{O}_2$  plus 5%  $\text{CO}_2$  at 37°C. The TSM strips were equilibrated in physiologic solution for 60 min with

three changes of physiologic solution and maintained under an optimal tension of 1.0 g. Contraction was recorded isometrically *via* a force-displacement transducer connected to a recorder (BIOPAC System, Goleta, CA). To determine the effects of propofol on contraction induced by carbachol, TSM strips were initially stimulated by 50 mM KCl, and the tensions were defined as the maximal contraction. Following washing out and equilibration, the TSM strips were divided into three groups, incubated 30 min with dimethylsulfoxide (DMSO) or 100  $\mu\text{M}$  or 300  $\mu\text{M}$  propofol (dissolved in DMSO), respectively. Cumulative concentration response curves for carbachol (10 nM to 1 mM) were constructed. Results are expressed as a percentage of maximal response induced by 50 mM KCl.

### Isolation of Tracheal Smooth Muscle Cells

Tracheal smooth muscle cells (TSMCs) were isolated according to the method described previously.<sup>15,16</sup> In brief, the smooth muscle was dissected, minced, and transferred to the dissociation medium containing 0.1% collagenase IV, 0.025% deoxyribonuclease I, and 0.025% elastase IV and antibiotics (100 U/ml penicillin, 100  $\mu\text{g}/\text{ml}$  streptomycin, 50  $\mu\text{g}/\text{ml}$  gentamicin and 2.5  $\mu\text{g}/\text{ml}$  fungizone) in a solution composed of (in mM): NaCl 137, KCl 5,  $\text{CaCl}_2$  1.1,  $\text{NaHCO}_3$  20,  $\text{NaH}_2\text{PO}_4$  1, glucose 11, HEPES 25, pH 7.4. The tissue pieces were gently agitated at 37°C in a rotary shaker for 1 h; the released cells were collected and the residue was digested in the same fresh enzyme solution for an additional hour at 37°C. All released cells were collected and washed twice with Dulbecco's modified Eagle's medium (DMEM) and Ham's nutrient mixture F-12 medium (1:1, v/v). The cells, suspended in DMEM/F-12 containing fetal bovine serum (FBS) 10%, were preplated onto petri dishes (60 mm) and incubated at 37°C for 1 h to remove fibroblasts. The cells then were counted and diluted with DMEM/F-12 to  $2 \times 10^5$  cells/ml. The cells, suspended in DMEM/F-12 containing 10% FBS, were plated onto 24-well (0.5 ml per well), 12-well (1 ml per well), or six-well (2 ml per well) culture plates containing glass coverslips coated with collagen for receptor binding assay, IP accumulation, and  $\text{Ca}^{2+}$  measurement, respectively. The culture medium was changed after 24 h and then changed every 3 days. After 5 days in culture, the cells were changed to DMEM/F-12 containing FBS (1%) for 24 h at 37°C. Then the cells were cultured in DMEM/F-12 containing FBS (1%) supplemented with insulin-like growth factor (10 ng/ml) and insulin (1  $\mu\text{g}/\text{ml}$ ) for 12–14 days.

To characterize the isolated and cultured TSMCs and to

exclude the possibility of contamination by epithelial cells and fibroblasts, the cells were identified by an indirect immunofluorescent staining method using a monoclonal antibody of light chain myosin.<sup>17</sup> Over 95% of the cells were smooth muscle cells.

#### *Accumulation of Inositol Phosphates*

The effect of propofol on the hydrolysis of phosphoinositol was assayed by monitoring the accumulation of [<sup>3</sup>H]-labeled IPs as described by Berridge *et al.*<sup>18</sup> Cultured TSMCs were incubated with 5  $\mu$ Ci/ml of myo-[2-<sup>3</sup>H]-inositol at 37°C for 2 days. TSMCs were washed two times with phosphate-buffered saline and incubated in Krebs-Henseleit buffer (Krebs-Henseleit solution, pH 7.4) containing (in mM): NaCl 117, MgSO<sub>4</sub> 1.1, KH<sub>2</sub>PO<sub>4</sub> 1.2, NaHCO<sub>3</sub> 20, CaCl<sub>2</sub> 2.4, glucose 1, HEPES 20, and LiCl 10 at 37°C for 30 min. Propofol was added 30 min before the addition of the agonist. Control group was treated with the same concentration of DMSO. After the addition of carbachol, incubation was continued for another 60 min. Reactions were terminated by addition of 5% perchloric acid followed by sonication and centrifugation at 3,000g for 15 min.

The perchloric acid soluble supernatants were extracted four times with ether, neutralized with potassium hydroxide, and applied to a column of AG1-X8, formate form, 100–200 mesh (Bio-Rad, Hercules, CA). The resin was washed successively with 5 ml of 60 mM ammonium formate and 5 mM sodium tetraborate to eliminate free myo-[<sup>3</sup>H]-inositol and glycerophosphoinositol, respectively. The fraction of total IPs was eluted with 5 ml of 1 M ammonium formate and 0.1 M formic acid. The amount of [<sup>3</sup>H]-IPs was determined in a radio-spectrometer (Beckman LS5000TA, Fullerton, CA).

#### *[<sup>3</sup>H]N-Methyl Scopolamine Binding Assay*

For detection of the effect of propofol on muscarinic receptor density or affinity on TSMCs, [<sup>3</sup>H]N-methylscopolamine ([<sup>3</sup>H]NMS) was used as a radioligand. Total number of cell-surface [<sup>3</sup>H]NMS binding sites per well was determined by incubating cells in phosphate-buffered saline containing various concentrations of [<sup>3</sup>H]NMS ranging from 20 to 1,000 pM. nonspecific binding of [<sup>3</sup>H]NMS was determined in the presence of 1  $\mu$ M atropine sulfate. Binding reactions were incubated at 37°C for 45 min and terminated by removing the reaction mixture and washing the cells three times with phosphate-buffered saline. Cells were solubilized in 0.1 N NaOH and scintillation fluid and counted in a radio-spectrometer. The dissociation constant (K<sub>D</sub>) and total

receptor density (B<sub>max</sub>) were calculated by GraphPad Prism (GraphPad Software, San Diego, CA).

#### *Measurement of Intracellular Ca<sup>2+</sup> Level*

[Ca<sup>2+</sup>]<sub>i</sub> was measured in confluent monolayers with the calcium-sensitive dye fura-2/AM as described by Grynkiewicz *et al.*<sup>19</sup> Upon confluence, the cells were cultured in DMEM/F-12 with 1% FBS 1 day before measurements were taken. The monolayers were covered with 1 ml of DMEM/F-12 with 1% FBS containing 5  $\mu$ M fura-2/AM and incubated at 37°C for 45 min. At the end of the loading period, the coverslips were washed twice with physiologic buffer as described in Contractile Response. The cells were incubated in the same buffer with or without propofol for another 30 min to complete dye deesterification. The coverslip was inserted into a quartz cuvette at an angle of approximately 45 degrees to the excitation beam and placed in the thermostatted holder of an SLM 8000C spectrofluorometer (SLM, Urbana, IL). Continuous stirring was achieved with a magnetic stirrer.

Fluorescence of Ca<sup>2+</sup>-bound and unbound fura-2 was measured by rapidly alternating the dual excitation wavelengths between 340 and 380 nm and electronically separating the resultant fluorescence signals at an emission wavelength of 510 nm. The autofluorescence of each monolayer was subtracted from the fluorescence data. The ratios of the fluorescence at the two wavelengths were computed and used to calculate changes in [Ca<sup>2+</sup>]<sub>i</sub>. The ratios of maximum and minimum fluorescence of fura-2 were determined by the addition of ionomycin (10  $\mu$ M) in the presence of Phocal buffer containing 5 mM Ca<sup>2+</sup> and by adding 5 mM EGTA at pH 8 in Ca<sup>2+</sup>-free Phocal buffer, respectively. The K<sub>D</sub> of fura-2 for Ca<sup>2+</sup> was assumed to be 224 nM.<sup>19</sup>

#### *Materials*

Propofol was purchased from Aldrich (Milwaukee, WI). DMEM and FBS were purchased from J.R. Scientific (Woodland, CA). Myo-[2-<sup>3</sup>H]inositol (18 Ci/mmol) and [<sup>3</sup>H]N-methyl scopolamine (84 Ci/mmol) were obtained from Amersham (Buckinghamshire, UK), and DMEM-inositol free medium was from Life Technologies (Gaithersburg, MD). Fura-2/AM was ordered from Molecular Probes (Eugene, OR) and enzyme and other chemicals from Sigma (St. Louis, MO).

#### *Statistical Analysis*

Concentration-effect curves were fitted by GraphPad Prism. EC<sub>50</sub> values were estimated by the same program

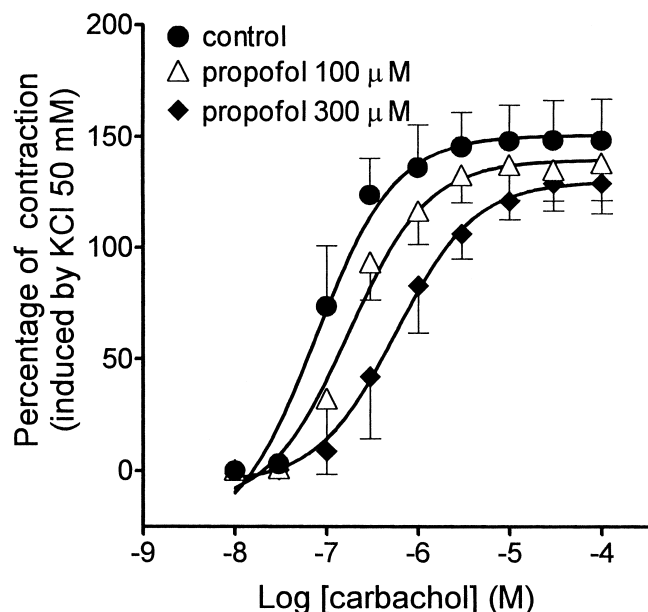

Fig. 1. Inhibition of carbachol-induced tracheal smooth muscle (TSM) strips contraction by propofol. The TSM strips were divided into three groups, incubated 30 min with dimethylsulfoxide (control, circles), 100  $\mu\text{M}$  propofol (triangles), and 300  $\mu\text{M}$  propofol (diamonds), respectively. Cumulative concentration-response curves for carbachol (10 nM to 1 mM) were obtained. Data are normalized to maximal response induced by 50 mM KCl and expressed as mean  $\pm$  SD of six separate experiments.

and expressed as the mean  $\text{pEC}_{50}$  ( $-\log \text{EC}_{50}$ , expressed in M)  $\pm$  SD. Data were expressed as the mean  $\pm$  SD and analyzed with the Student *t* test or one-way analysis of variance as indicated at a 0.05 level of significance. The Bonferroni post-test was performed if one-way analysis of variance was significant.

## Results

### Effect of Propofol on the Contraction of TSM Strips

To assess the effect of propofol on modulation of the constrictor response to cholinergic stimulation, concentration-response relationships to carbachol were compared among TSM strips pretreated with DMSO (control), 100  $\mu\text{M}$  propofol, and 300  $\mu\text{M}$  propofol. The  $\text{pEC}_{50}$  values were  $7.12 \pm 0.26$ ,  $6.75 \pm 0.21$ , and  $6.24 \pm 0.10$ , respectively (fig. 1). Compared with the controls, propofol of either dose significantly decreased the  $\text{pEC}_{50}$  ( $P < 0.05$ ) and shifted the concentration-response curves of carbachol to the right in a dose-dependent manner. However, the maximal responses to carbachol were slightly but not significantly attenuated by 100  $\mu\text{M}$  or 300

$\mu\text{M}$  propofol with the values of  $137.9 \pm 16.8\%$  and  $128.8 \pm 13.9\%$ , respectively, compared with the value of  $148.1 \pm 18.4\%$  obtained in controls.

### Effects of Propofol on Carbachol-induced $\text{Ca}^{2+}$ Mobilization

Calcium ions play a key role in the contraction of TSMCs. The activation of mAChRs results in the release of  $\text{Ca}^{2+}$  from sarcoplasmic reticulum and the entry of extracellular  $\text{Ca}^{2+}$ . In our previous study, carbachol produced a biphasic  $[\text{Ca}^{2+}]_i$  change in the presence of extracellular  $\text{Ca}^{2+}$ , which displayed an initial transient peak and a sustained plateau phase.<sup>13</sup>

To check whether propofol attenuates the increase of  $[\text{Ca}^{2+}]_i$  induced by carbachol, the effect of propofol on the concentration-response curve of carbachol was examined. The confluent coverslips with TSMC monolayers were pretreated with DMSO (control) or propofol (100  $\mu\text{M}$  or 300  $\mu\text{M}$ ) for 30 min, and the initial peak of  $[\text{Ca}^{2+}]_i$  induced by carbachol was measured. Concentration-response curves for carbachol (10 nM to 0.1 mM) were constructed. Figure 2A-C shows the traces of carbachol-induced  $[\text{Ca}^{2+}]_i$  change in various concentrations. As displayed in figure 2D, the  $\text{pEC}_{50}$  values for carbachol were  $6.85 \pm 0.58$ ,  $5.93 \pm 0.18$ ,  $4.55 \pm 1.33$  in the control and propofol (100  $\mu\text{M}$  and 300  $\mu\text{M}$ )-treated TSMCs, respectively, with corresponding maximal increase in  $[\text{Ca}^{2+}]_i$  of  $132.4 \pm 22.7$ ,  $91.0 \pm 24.5$ , and  $26.1 \pm 20.4$  nM, respectively. Compared with the controls, maximal response and  $\text{pEC}_{50}$  to carbachol were significantly attenuated ( $P < 0.05$ ) by either dose of propofol. Accordingly, propofol shifted the dose-response curve for carbachol to the right in a dose-dependent manner.

To further elucidate the mechanism of the attenuation of  $[\text{Ca}^{2+}]_i$  increase, the effect of propofol on  $\text{Ca}^{2+}$  release from internal stores and the influx of extracellular  $\text{Ca}^{2+}$  was examined. The confluent coverslips with TSMC monolayers (different cells from different dogs) were pretreated with DMSO (control) or propofol (1  $\mu\text{M}$  to 300  $\mu\text{M}$ ) for 30 min. The initial peak of  $[\text{Ca}^{2+}]_i$  induced by carbachol (100  $\mu\text{M}$ ) was measured in the absence of extracellular  $\text{Ca}^{2+}$ . Then,  $\text{Ca}^{2+}$  was added with the final extracellular  $\text{Ca}^{2+}$  concentration at 1.8 mM, and  $[\text{Ca}^{2+}]_i$  was measured. Figure 3A shows the trace of carbachol-induced  $[\text{Ca}^{2+}]_i$  increase in the absence of extracellular  $\text{Ca}^{2+}$  before 300 s, and the presence of  $\text{Ca}^{2+}$  when it was added at 300 s. The maximal increased  $[\text{Ca}^{2+}]_i$  measured in the absence of extracellular  $\text{Ca}^{2+}$  represents its release from internal



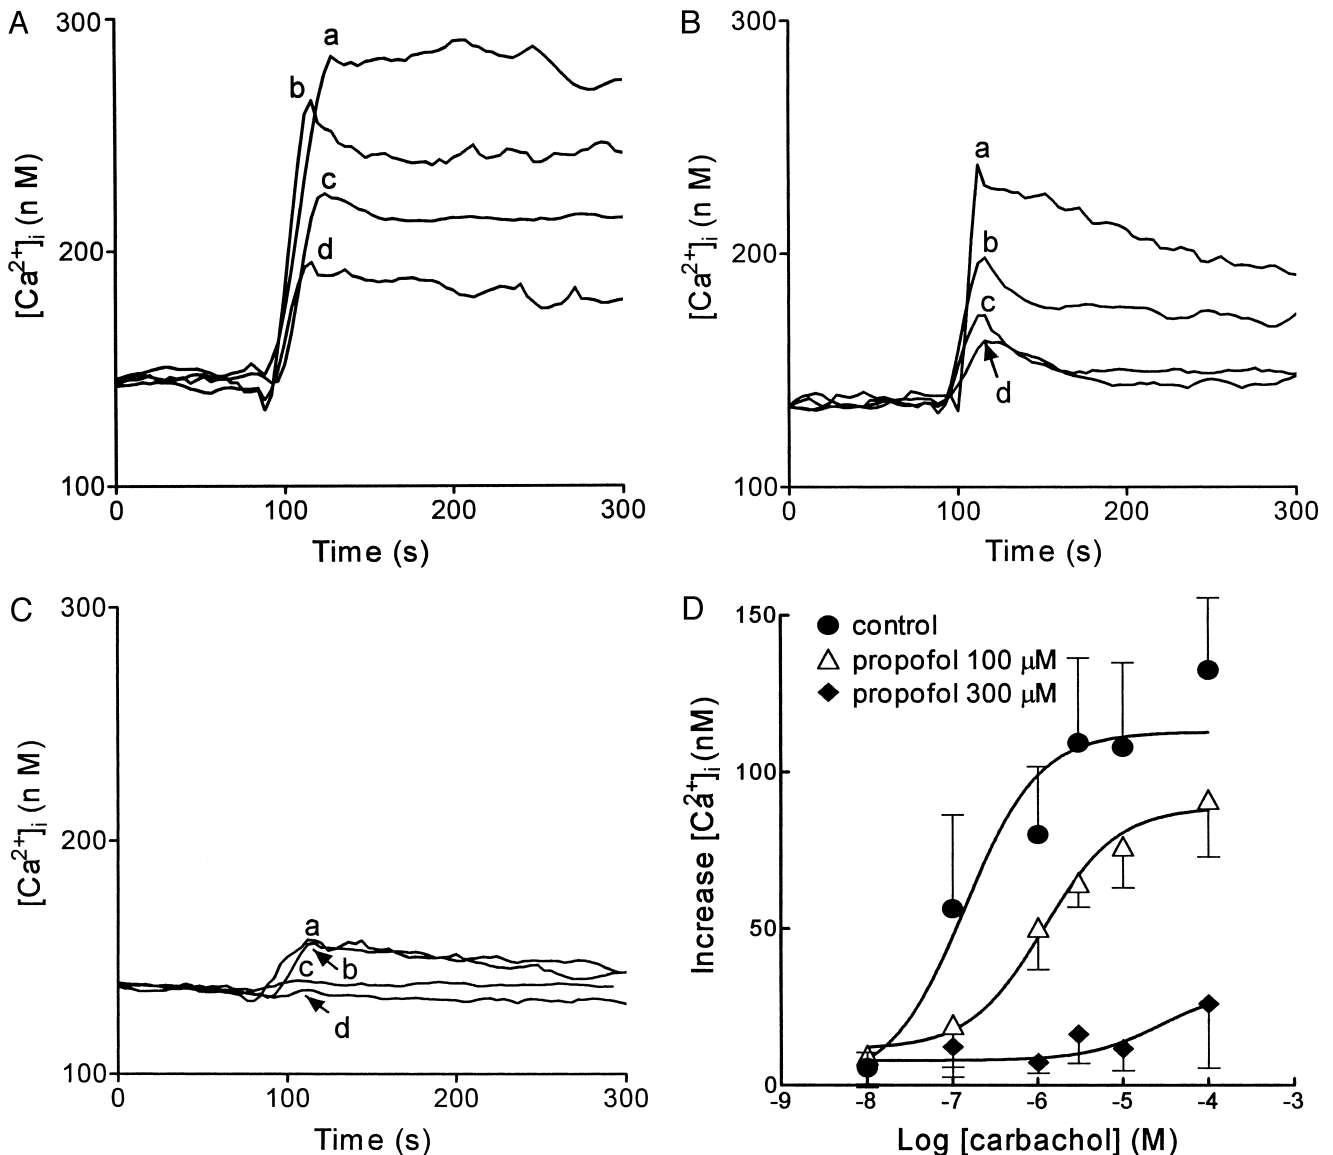

**Fig. 2.** Inhibition of the carbachol-induced  $[Ca^{2+}]_i$  increase by propofol. Tracheal smooth muscle cells were incubated in the absence (A) or presence of 100  $\mu M$  (B) or 300  $\mu M$  (C) propofol for 30 min,  $[Ca^{2+}]_i$  was measured with various concentrations of carbachol (a, 100  $\mu M$ ; b, 10  $\mu M$ ; c, 1  $\mu M$ ; d, 100 nM) added at 100 s. (D) The concentration-response curves for carbachol (10 nM to 0.1 mM; circles, control; triangles, 100  $\mu M$  propofol; diamonds, 300  $\mu M$  propofol). Data represent mean  $\pm$  SD derived from six separate experiments as the increase above the resting level.

store, that is, sarcoplasmic reticulum, and  $[Ca^{2+}]_i$  measured in the readdition of  $Ca^{2+}$  represents  $Ca^{2+}$  influx from extracellular source. Pretreatment of TSMCs with propofol at concentrations of 10, 100, and 300  $\mu M$  significantly attenuated carbachol-induced  $Ca^{2+}$  release from internal stores, with maximal responses at  $51.1 \pm 8.5$ ,  $45.3 \pm 6.9$ ,  $30.3 \pm 7.6$  nM, respectively, as compared with control cells at  $73.7 \pm 11.5$ ,  $P <$

0.05 (fig. 3B). Following the measurement of transient  $[Ca^{2+}]_i$ ,  $Ca^{2+}$  (1.8 mM) was readded to measure its influx into TSMCs. Propofol alone had no effect on  $[Ca^{2+}]_i$  (data not shown). These results showed that pretreatment of these cells with 10, 100, and 300  $\mu M$  propofol significantly blocked carbachol-induced  $Ca^{2+}$  influx, with maximal responses at  $71.5 \pm 20.0$ ,  $67.6 \pm 17.8$ , and  $56.4 \pm 19.5$  nM, respectively, as

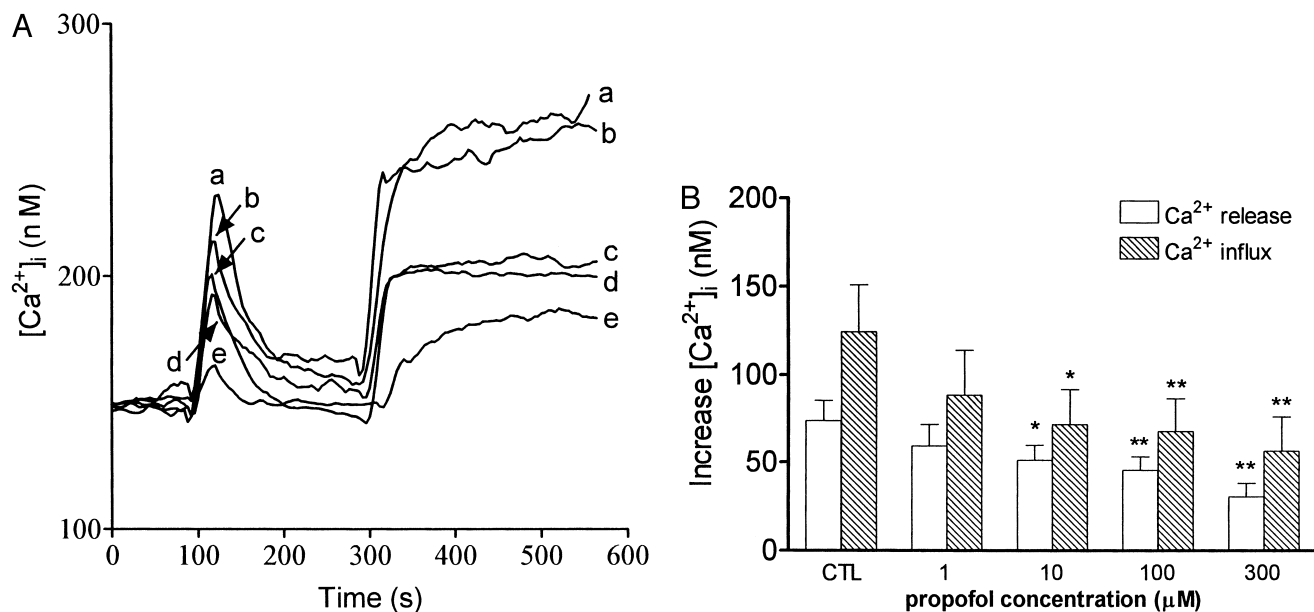

Fig. 3. Effect of propofol on the carbachol-induced  $Ca^{2+}$  release and influx. (A) Tracheal smooth muscle cells were incubated in the absence (a, control) or presence of propofol (b, 1  $\mu$ M; c, 10  $\mu$ M; d, 100  $\mu$ M; e, 300  $\mu$ M) for 30 min. The initial peaks of  $[Ca^{2+}]_i$  induced by carbachol (100  $\mu$ M added at 100 s) were measured (B, open column) in the absence of extracellular  $Ca^{2+}$ . Then,  $Ca^{2+}$  was added at 300 s, with a final extracellular  $Ca^{2+}$  concentration of 1.8 mM, and  $[Ca^{2+}]_i$  was measured (B, hatched column). Data represent mean  $\pm$  SD derived from six separate experiments as the increase above the resting level. \* $P < 0.05$  vs. control; \*\* $P < 0.01$  vs. control.

compared with control cells at  $124.4 \pm 26.4$  nM,  $P < 0.05$  (fig. 3B). However, at the lower concentration 1  $\mu$ M of propofol did not affect carbachol-induced  $Ca^{2+}$  response in TSMCs.

#### Effect of Propofol on Carbachol-induced IP Accumulation

Propofol attenuates the  $Ca^{2+}$  release induced by carbachol, whereas  $Ca^{2+}$  release is determined by the binding of  $IP_3$  to its receptors on the sarcoplasmic reticulum.<sup>20</sup> To determine whether propofol interferes with the production of  $IP_3$ , the IP accumulation induced by carbachol was measured in the absence or presence of propofol (100  $\mu$ M and 300  $\mu$ M). As shown in figure 4, propofol significantly shifted the concentration response curves of carbachol to the right in a dose-dependent manner. The maximal response for carbachol was also inhibited by propofol. The  $pEC_{50}$  values,  $4.20 \pm 0.26$  and  $4.00 \pm 0.22$ , for carbachol-induced IP accumulation were significantly attenuated in the presence of 100 and 300  $\mu$ M propofol, respectively, as compared with control ( $4.90 \pm 0.12$ ,  $P < 0.05$ ).

#### Effect of Propofol on $[^3H]NMS$ Binding

The finding that propofol inhibited the production of IP indicated that it may interfere with the receptor-

coupled signal transduction. The action site may be located at the muscarinic receptors. To examine whether propofol alters  $B_{max}$  or  $K_D$  for the muscarinic receptor, a receptor binding assay was performed in TSMCs treated with propofol for 30 min, using  $[^3H]NMS$  as a radioligand. Figure 5A shows the saturation binding isotherm derived from one of five experiments. Scatchard plot analysis of the specific bound  $[^3H]NMS$  is displayed in figure 5B. The x-intercept of the least-squares fit to Scatchard plot is a measure of  $B_{max}$ , and the negative reciprocal of the slope is the  $K_D$ . The  $B_{max}$  and  $K_D$  values are summarized in table 1. These results demonstrate that pretreatment of TSMCs with both concentrations of propofol does not significantly change the  $B_{max}$  of mAChRs. Similarly, the  $K_D$  value was not significantly altered by pretreatment with 100  $\mu$ M propofol. However, propofol concentration at 300  $\mu$ M significantly attenuated the affinity of mAChR for  $[^3H]NMS$  binding (propofol,  $952 \pm 229$  pM; control,  $588 \pm 98$  pM;  $P < 0.05$ ).

#### Discussion

It has been well known that parasympathetic nervous system forms the predominant neural pathway and plays

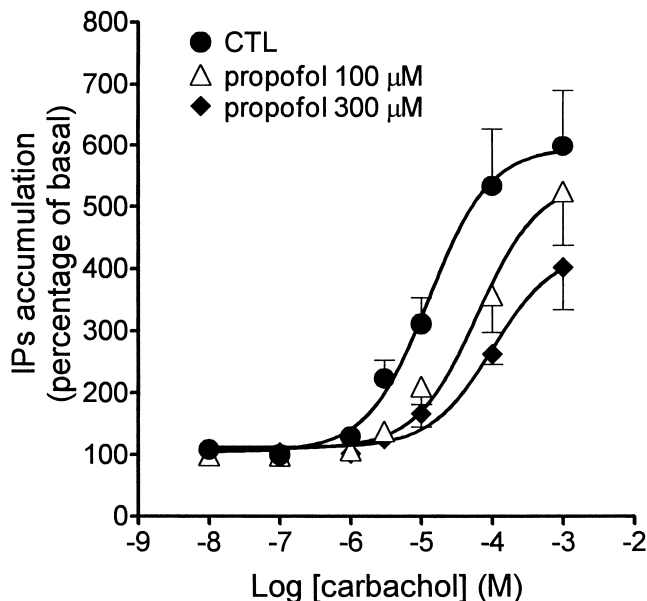

Fig. 4. Inhibition of carbachol-induced inositol phosphate (IP) accumulation by propofol. IP accumulation was measured in the absence (control, circles) and presence of 100  $\mu$ M (triangles) or 300  $\mu$ M (diamonds) propofol. Concentration-response curves for carbachol-induced inositol phosphate accumulation were obtained. Results were normalized to the basal levels of inositol phosphates and expressed as mean  $\pm$  SD of five separate experiments determined in triplicate.

an important role in the regulation of airway diameter and resistance to airflow in mammalian airway.<sup>10</sup> Neurotransmitter acetylcholine released from parasympathetic nerve endings stimulates the contraction of airway smooth muscle *via* the activation of guanosine 5'-triphosphate-binding protein-coupled signal-transduction pathway.<sup>15,21</sup> The activation of G-protein further activates phospholipase C, which hydrolyzes phosphoinositide, leading to the formation of IP<sub>3</sub> and diacylglycerol.<sup>22</sup> IP<sub>3</sub> in turn stimulates the release of calcium ions from its intracellular stores.<sup>23</sup> Diacylglycerol translocates the cytosolic protein kinase C to the cell membrane, and the activation of protein kinase C further phosphorylates substrates on cell membrane, resulting in the opening of calcium channel.<sup>24,25</sup> In addition, the activation of receptors also results in the opening of calcium channels *via* the guanosine 5'-triphosphate-binding protein or membrane depolarization.<sup>26,27</sup> The increased [Ca<sup>2+</sup>]<sub>i</sub> activates myosin light chain kinase through a calmodulin-dependent mechanism.<sup>28</sup> The active kinase phosphorylates myosin light chain, leading to initiation of contraction. Thus, alteration in the components of the receptor-coupled signal-transduction pathway may be associated with the change in the tension of airway

smooth muscle. In the present study, these results demonstrated that propofol attenuated the contraction mediated by mAChRs in this tissue. The mechanism underlying the relaxant effects might be caused inhibition of Ca<sup>2+</sup> mobilization and attenuation of the generation of IPs *via* the inhibition of the receptor-coupled signal-transduction pathway.

In the current study, our results regarding the relaxant effect of propofol on airway smooth muscle (fig. 1) are consistent with other studies either *in vivo*<sup>2,3</sup> or *in vitro*.<sup>4-6</sup> Because Ca<sup>2+</sup> plays an important role in the contraction of smooth muscle, we examine the effect of propofol on the Ca<sup>2+</sup> mobilization and IP accumulation in cultured TSMCs induced by carbachol. In our previous study, a cell-culture model of TSMCs expressing functional mAChRs was shown to be a useful method for studying the physiologic function of airway smooth muscle.<sup>29</sup> The density of mAChRs expressed in primary culture of TSMCs was approximately 75% of that in freshly isolated TSMCs. Furthermore, carbachol produced a biphasic [Ca<sup>2+</sup>]<sub>i</sub> change in the presence of extracellular Ca<sup>2+</sup>, which displayed an initial transient peak and a sustained plateau phase.<sup>13</sup> In contrast, in the absence of extracellular Ca<sup>2+</sup>, carbachol induced a smaller transient peak, and the sustained plateau phase was not observed. This represents the Ca<sup>2+</sup> release from the internal store in the absence of extracellular Ca<sup>2+</sup>. Readdition of Ca<sup>2+</sup> to TSMCs after stimulation with carbachol in the absence of extracellular Ca<sup>2+</sup> caused a sustained increase in [Ca<sup>2+</sup>]<sub>i</sub>, which was defined as the Ca<sup>2+</sup> influx from extracellular source. In the present study, we demonstrated that propofol not only attenuated the Ca<sup>2+</sup> mobilization but also decreased the pEC<sub>50</sub> in the concentration-response curves for carbachol (fig. 2), consistent with the results obtained from freshly isolated rat TSMCs.<sup>6</sup> We further examined the effect of propofol on Ca<sup>2+</sup> release from internal store and the influx of extracellular Ca<sup>2+</sup>. Propofol was shown to attenuate not only the Ca<sup>2+</sup> release from SR but also the influx of extracellular Ca<sup>2+</sup> (fig. 3). The inhibition of Ca<sup>2+</sup> influx may be caused by blockade of voltage-dependent Ca<sup>2+</sup> channels as shown in porcine TSM.<sup>9</sup> In addition, in rat TSM, Quedraogo et al.<sup>6</sup> also demonstrated that propofol inhibits KCl-induced [Ca<sup>2+</sup>]<sub>i</sub> increase, which indicates the inhibition of Ca<sup>2+</sup> influx through voltage-dependent Ca<sup>2+</sup> channels. It is also the case in other cell types that propofol inhibits the voltage-dependent Ca<sup>2+</sup> channels.<sup>8,30-32</sup> Taken together, our results are consistent with these studies that propofol might inhibit voltage-dependent Ca<sup>2+</sup> channels and attenuate Ca<sup>2+</sup> in-

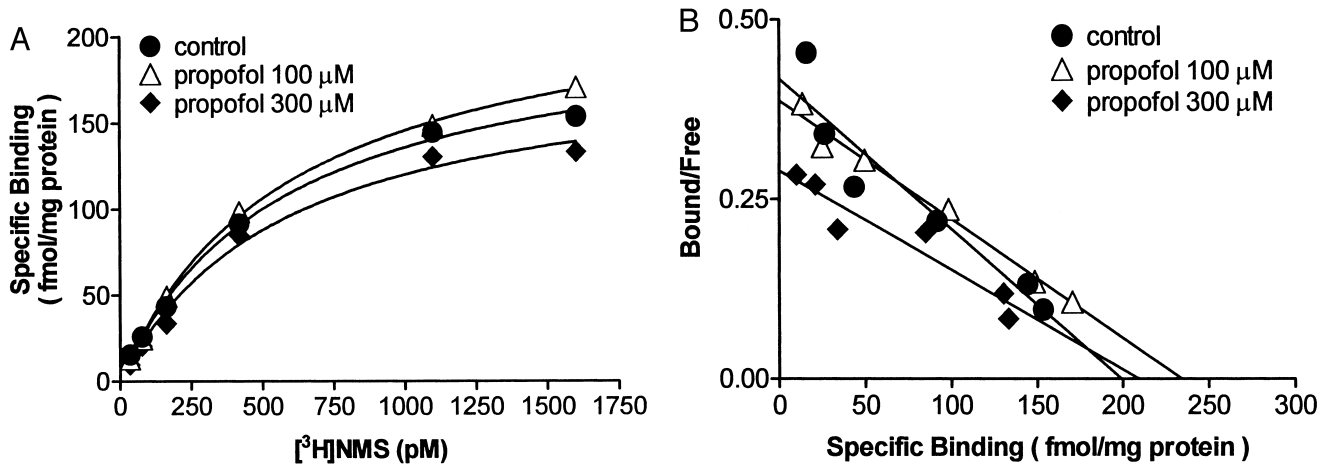

Fig. 5. Comparison of muscarinic cholinergic receptor density and affinity in propofol-treated tracheal smooth muscle cells. The cells were incubated in the absence (control, circles) or presence of 100  $\mu\text{M}$  (triangles) or 300  $\mu\text{M}$  (diamonds) propofol for 30 min. (A) Binding assays were performed in triplicate with concentration of  $[^3\text{H}]\text{NMS}$  ranging from 20 to 1,600 pM. Each curve represents one experiment. (B) Scatchard plot of specific  $[^3\text{H}]\text{NMS}$  binding data in (A). X-intercept of least-squares fit to Scatchard plot is a measure of maximal receptor density ( $B_{\text{max}}$ ) and negative reciprocal of slope is the dissociation constant ( $K_D$ ). Data are from one of five experiments.

flux.<sup>8,13,30–32</sup> In addition,  $\text{Ca}^{2+}$  homeostasis is integrated by several mechanisms located on the plasma membrane and inside of cells. Propofol may also influence the  $\text{Ca}^{2+}$ -adenosine triphosphatase pumps that move  $\text{Ca}^{2+}$  both to the internal stores and outside of the cells. Because of the limitations of experimental techniques, we did not make an attempt to differentiate the effect of propofol on these components in this study. The effect of propofol on these pump activities needs to be further investigated.

$\text{Ca}^{2+}$  release from intracellular stores is regulated by two mechanisms:  $\text{IP}_3$ -induced  $\text{Ca}^{2+}$  release and  $\text{Ca}^{2+}$ -induced  $\text{Ca}^{2+}$  release.<sup>20,33</sup> We further examined the effects of propofol on the production of  $\text{IP}_3$  and demonstrated that propofol attenuates the  $\text{IP}_3$  production induced by carbachol (fig. 4), which is associated with

inhibition of  $\text{Ca}^{2+}$  release (fig. 3). It seems unlikely that propofol depletes the  $\text{Ca}^{2+}$  content of SR, because it does not alter the basal level of  $[\text{Ca}^{2+}]_i$ . In rat aortic smooth muscle, propofol has been shown to inhibit the  $\text{IP}_3$  production induced by endothelin-1 and arginine vasopressin,<sup>8</sup> which further supports our observation. As mentioned previously,  $\text{IP}_3$  is a second messenger in the  $\text{M}_3$  receptor-coupled signaling pathway. This finding also indicates that propofol may interfere with the receptor-coupled signal-transduction pathway.

To locate the site of action, the effect of propofol on the  $B_{\text{max}}$  and  $K_D$  of muscarinic receptors was examined. It was shown that propofol did not alter the  $B_{\text{max}}$ , which was consistent with the results that propofol had no effect on endothelin-1 binding to its receptor.<sup>34</sup> In addition, propofol has been shown to attenuate histamine-induced contraction of human TSM and acetylcholine-induced  $\text{Ca}^{2+}$  mobilization in rat TSMCs.<sup>6</sup> These results suggest that the effect of propofol is not restricted to mAChR activation. However, at the concentration of 300  $\mu\text{M}$ , propofol significantly decreased the binding affinity of mAChRs. These data indicate that at the concentration of 100  $\mu\text{M}$ , the action site is downstream to agonist-receptor binding, however, at higher concentration, the receptor-binding dynamic was also altered. Propofol may interfere with the components of receptor-G-protein-phospholipase C pathway; however, the precise site of action is not known. These findings demonstrated that

Table 1. Comparison of  $B_{\text{max}}$  and  $K_D$  in Control and Propofol-treated TSMCs

|                            | $B_{\text{max}}$ (fmol/mg protein) | $K_D$ (pM)     |
|----------------------------|------------------------------------|----------------|
| Control                    | 185 $\pm$ 17                       | 588 $\pm$ 98   |
| Propofol 100 $\mu\text{M}$ | 192 $\pm$ 26                       | 720 $\pm$ 259  |
| Propofol 300 $\mu\text{M}$ | 183 $\pm$ 23                       | 952 $\pm$ 229* |

Comparison of mAChR density and affinity in propofol-treated tracheal smooth muscle cells. The cells were incubated in the absence (control) or presence of 100  $\mu\text{M}$  or 300  $\mu\text{M}$  propofol for 30 min. Binding assays were performed with concentration of  $[^3\text{H}]\text{NMS}$  ranging from 20 to 1,600 pM.  $B_{\text{max}}$  and  $K_D$  were derived from Scatchard plot of specific  $[^3\text{H}]\text{NMS}$  binding data. Data represent mean  $\pm$  SD of five separate experiments determined in triplicate.

\*  $P < 0.05$  versus control.



the inhibition of receptor-G-protein-phospholipase C pathway by propofol was involved in the inhibition of smooth muscle contraction.

In an *in vivo* study of a bolus intravenous dose of  $^{14}\text{C}$ -propofol (7-10 mg/kg) to dogs, propofol concentrations were 4-16  $\mu\text{g/ml}$  (22-88  $\mu\text{M}$ ) at 2 min. Duration of sleep ranged from 5 to 8 min.<sup>35</sup> However, the free plasma concentration of propofol was less than 8.8  $\mu\text{M}$ , because of its strong protein-binding properties (>90%). At anesthetic level, the concentration of propofol in whole brain (225  $\mu\text{M}$ ) was 7.8 times that in plasma (29  $\mu\text{M}$ ) 30 min after intravenous infusion of propofol at 60  $\text{mg} \cdot \text{kg}^{-1} \cdot \text{h}^{-1}$ .<sup>36</sup> The effective concentration in plasma is usually less than 1  $\mu\text{M}$ , because propofol is a highly protein-binding agent.<sup>37</sup> Thus, the concentrations used in this study are one or two orders of magnitude higher than achieved *in vivo* under clinical conditions. However, there are no data related to the tissue:plasma or tissue:blood ratio in canine TSM. The results in the contractile-response experiment revealed that propofol did not reduce the maximal tension induced by carbachol (fig. 1). However, propofol significantly attenuated the maximal IP accumulation and  $[\text{Ca}^{2+}]_i$  change induced by carbachol (fig. 2D and fig. 4). This discrepancy may result from the difference between freshly isolated TSM tissues and cultured smooth muscle cells. In addition, although less likely, it may be caused by the more complete distribution of propofol in cultured cells than in intact tissues. Moreover, higher concentrations of propofol may be needed to across the connective tissues served as a permeability barrier to reach smooth muscle. This may be the reason why 10  $\mu\text{M}$  propofol attenuates carbachol-induced increase in  $[\text{Ca}^{2+}]_i$  but has no effect on contractile response. However, all the inhibitory effects of propofol are obtained at high concentrations, and the clinical relevance is not clear.

In conclusion, this study examined the relaxant effect of propofol on canine airway smooth muscle and elucidated the mechanisms of its action. These results demonstrated that (1) propofol attenuated the contraction induced by carbachol in a concentration-dependent manner; (2) propofol attenuated not only the  $\text{IP}_3$ -induced  $\text{Ca}^{2+}$  release from internal store but also the influx of external  $\text{Ca}^{2+}$ ; (3) carbachol-induced  $\text{IP}_3$  production was also attenuated by propofol, indicating that propofol interfered with the signal transduction pathway; and (4) propofol at a higher concentration (300  $\mu\text{M}$ ) decreased the binding affinity of muscarinic receptor but did not alter the receptor density. Taken together, propofol inhibited the carba-

chol-induced contraction of canine TSM. The mechanisms underlying this inhibition may involve the inhibition of the muscarinic receptor-mediated signal transduction pathway.

## References

1. Sebel PS, Lowdon JD: Propofol: A new intravenous anesthetic. *ANESTHESIOLOGY* 1989; 71:260-77
2. Cigarini I, Bonnet F, Lorino AM, Harf A, Desmonts JM: Comparison of the effects of fentanyl on respiratory mechanics under propofol or thiopental anaesthesia. *Acta Anaesth Scand* 1990; 34:253-56
3. Pedersen CM: The effect of sedation with propofol on postoperative bronchoconstriction in patients with hyperreactive airway disease. *Intensive Care Med* 1992; 18:45-6
4. Pedersen CM, Thirstrup S, Nielsen-Kudsk JE: Smooth muscle relaxant effects of propofol and ketamine in isolated guinea-pig trachea. *Eur J Pharmacol* 1993; 238:75-80
5. Cheng EY, Mazzeo AJ, Bosnjak ZJ, Coon RL, Kampine JP: Direct relaxant effects of intravenous anesthetics on airway smooth muscle. *Anesth Analg* 1996; 83:162-8
6. Ouedraogo N, Roux E, Forestier F, Rossetti M, Savineau JP, Marthan R: Effects of intravenous anesthetics on normal and passively sensitized human isolated airway smooth muscle. *ANESTHESIOLOGY* 1998; 88:317-26
7. Horowitz A, Menice CB, Laporte R, Morgan KG: Mechanisms of smooth muscle contraction. *Physiol Rev* 1996; 76:967-1003
8. Xuan YT, Glass PS: Propofol regulation of calcium entry pathways in cultured A10 and rat aortic smooth muscle cells. *Br J Pharmacol* 1996; 117:5-12
9. Yamakage M, Hirshman CA, Croxton TL: Inhibitory effects of thiopental, ketamine, and propofol on voltage-dependent  $\text{Ca}^{2+}$  channels in porcine tracheal smooth muscle cells. *ANESTHESIOLOGY* 1995; 83:1274-82
10. Barnes PJ: Neural control of human airways in health and disease. *Am Rev Resp Dis* 1986; 134:1289-314
11. Colebatch HJH, Halmagyi KFJ: Effect of vagotomy and vagal stimulation on lung mechanics and circulation. *J Appl Physiol* 1963; 18:881-7
12. van Koppen CJ, Rodrigues dMJ, Beld AJ, Hermanussen MW, Lammers JW, van Ginneken CA: Characterization of the muscarinic receptor in human tracheal smooth muscle. *Naunyn-Schmiedeberg Arch Pharmacol* 1985; 331:247-52
13. Yang CM, Yo YL, Wang YY: Intracellular calcium in canine cultured tracheal smooth muscle cells is regulated by  $\text{M}_3$  muscarinic receptors. *Br J Pharmacol* 1993; 110:983-8
14. Brichant JF, Warner DO, Gunst SJ, Rehder K: Muscarinic receptor subtypes in canine trachea. *Am J Physiol* 1990; 258:L349-54
15. Yang CM, Chou SP, Sung TC: Muscarinic receptor subtypes coupled to generation of different second messengers in isolated tracheal smooth muscle cells. *Br J Pharmacol* 1991; 104:613-8
16. Yang CM, Chou SP, Sung TC, Chien HJ: Regulation of functional muscarinic receptor expression in tracheal smooth muscle cells. *Am J Physiol* 1991; 261:C1123-9
17. Gown AM, Vogel AM, Gordon D, Lu PL: A smooth muscle-specific monoclonal antibody recognizes smooth muscle actin isoforms. *J Cell Biol* 1985; 100:807-13
18. Berridge MJ, Dawson RM, Downes CP, Heslop JP, Irvine RF:

# PROPOFOL AND AIRWAY SMOOTH MUSCLE CONTRACTION

Changes in the levels of inositol phosphates after agonist-dependent hydrolysis of membrane phosphoinositides. *Biochem J* 1983; 212: 473-82

19. Grynkiewicz G, Poenie M, Tsien RY: A new generation of  $\text{Ca}^{2+}$  indicators with greatly improved fluorescence properties. *J Biol Chem* 1985; 260:3440-50

20. Somlyo AV, Bond M, Somlyo AP, Scarpa A: Inositol trisphosphate-induced calcium release and contraction in vascular smooth muscle. *Proc Natl Acad Sci USA* 1985; 82:5231-35

21. Lucchesi PA, Scheid CR, Romano FD, Kargacin ME, Mullikin-Kilpatrick D, Yamaguchi H, Honeyman TW: Ligand binding and G protein coupling of muscarinic receptors in airway smooth muscle. *Am J Physiol* 1990; 258:C730-8

22. Berridge MJ, Irvine RF: Inositol phosphates and cell signalling. *Nature* 1989; 341:197-205

23. Ehrlich BE, Watras J: Inositol 1,4,5-trisphosphate activates a channel from smooth muscle sarcoplasmic reticulum. *Nature* 1988; 336:583-6

24. Nishizuka Y: The molecular heterogeneity of protein kinase C and its implications for cellular regulation. *Nature* 1988; 334:661-5

25. Murray RK, Kotlikoff MI: Receptor-activated calcium influx in human airway smooth muscle cells. *J Physiol* 1991; 435:123-44

26. Kamishima T, Nelson MT, Patlak JB: Carbachol modulates voltage sensitivity of calcium channels in bronchial smooth muscle of rats. *Am J Physiol* 1992; 263:C69-77

27. Godfraind T, Miller R, Wibo M: Calcium antagonism and calcium entry blockade. *Pharmacol Rev* 1986; 38:321-416

28. van Breemen C, Saida K: Cellular mechanisms regulating  $[\text{Ca}^{2+}]_i$  smooth muscle. *Annu Rev Physiol* 1989; 51:315-29

29. Yang CM, Chou SP, Sung TC, Chien HJ: Regulation of functional muscarinic receptor expression in tracheal smooth muscle cells. *Am J Physiol* 1991; 261:C1123-9

30. Yang CY, Wong CS, Yu CC, Luk HN, Lin CI: Propofol inhibits cardiac L-type calcium current in guinea pig ventricular myocytes. *ANESTHESIOLOGY* 1996; 84:626-35

31. Olcese R, Usai C, Maestroni E, Nobile M: The general anesthetic propofol inhibits transmembrane calcium current in chick sensory neurons. *Anesth Anal* 1994; 78:955-60

32. Zhou W, Fontenot HJ, Liu S, Kennedy RH: Modulation of cardiac calcium channels by propofol. *ANESTHESIOLOGY* 1997; 86:670-5

33. Iino M: Calcium-induced calcium release mechanism in guinea pig taenia caeci. *J Gen Physiol* 1989; 94:363-83

34. Tanabe K, Kozawa O, Kaida T, Matsuno H, Niwa M, Ohta S, Dohi S, Uematsu T: Inhibitory effects of propofol on intracellular signaling by endothelin-1 in aortic smooth muscle cells. *ANESTHESIOLOGY* 1998; 88:452-60

35. Simons PJ, Cockshott ID, Douglas EJ, Gordon EA, Knott S, Ruane RJ: Species differences in blood profiles, metabolism and excretion of  $^{14}\text{C}$ -propofol after intravenous dosing to rat, dog and rabbit. *Xenobiotica* 1991; 21:1243-56

36. Shyr MH, Tsai TH, Tan PP, Chen CF, Chan SH: Concentration and regional distribution of propofol in brain and spinal cord during propofol anesthesia in the rat. *Neurosci Lett* 1995; 184:212-5

37. Kirkpatrick T, Cockshott ID, Douglas EJ, Nimmo WS: Pharmacokinetics of propofol (diprivan) in elderly patients. *Br J Anaesth* 1988; 60:146-50
